# Supplementary material for: A dual-signal output ratiometric electrochemiluminescent sensor for NADH detection
Source: Royal Society of Chemistry journal article supplement (doi:10.1039/c9an00758j), 2019-01-01
Supplement: c9an00758j1.pdf [file c9an00758j1.pdf]

## **A dual-signal output ratiometric electrochemiluminescent sensor for NADH detection**

Hongjun Chen, \*,<sup>1</sup> Xiu Liu,<sup>2</sup> Cheng Yin<sup>1</sup>, Wang Li,\*,<sup>3</sup> Xiangdong Qin<sup>1</sup>, Changya  
Chen<sup>1</sup>

<sup>1</sup> *Hunan Provincial Key Laboratory of Fine Ceramics and Powder Materials, School of Materials and Environmental Engineering, Hunan University of Humanities, Science and Technology, Loudi, 417000, P. R. China*

<sup>2</sup> *Key Laboratory of Pesticide Harmless Application, Collaborative Innovation Center for Field Weeds Control (CICFWC) of Hunan Province, Hunan University of Humanities, Science and Technology, Loudi, 417000, P. R. China*

<sup>3</sup> *Hunan Key Laboratory of Processed Food for Special Medical Purpose, College of Food Science and Engineering, Central South University of Forestry and Technology, Changsha, 410004, P. R. China*

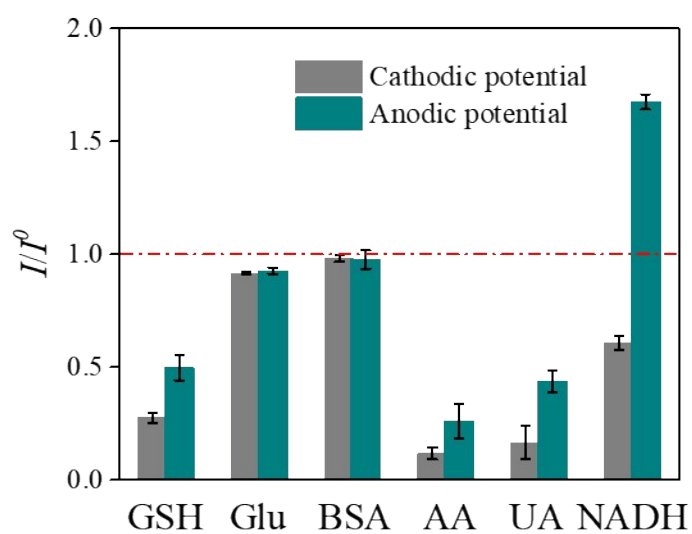

Fig. S1. Ratio values of different potential intensities of the dual-potential ECL system toward 100  $\mu\text{M}$  NADH against 200  $\mu\text{M}$  GSH, Glu, AA, uric acid (UA) and 10  $\text{mg mL}^{-1}$  BSA interfering species (note:  $I$  is the anodic or cathodic ECL peak intensity, the  $I^0$  is the initial anodic and cathodic ECL intensity of the dual-potential ECL system).

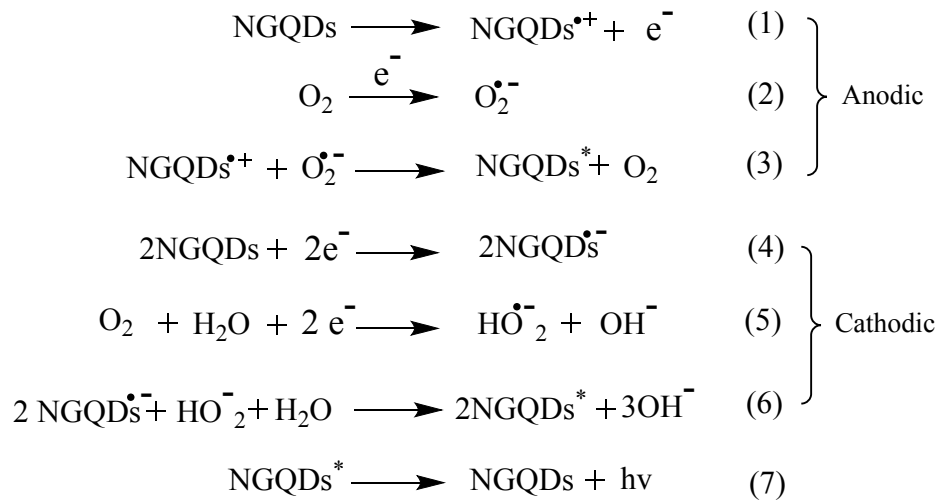

Scheme S1. The entire dual-potential ECL mechanism equations of NGQDs.

**Table S1.** Comparison of various methods and its composite used towards the detection of NADH.

| method          | Material or electrode       | Linear range     | Limit of detection | Reference |
|-----------------|-----------------------------|------------------|--------------------|-----------|
| Colorimetric    | MnO <sub>2</sub> nanosheets | 5.0–100 $\mu$ M  | -                  | [1]       |
| Electrochemical | PTH/SPCE                    | 5.0–100 $\mu$ M  | 3.0 $\mu$ M        | [2]       |
| Electrochemical | MWCNT/AuNP/PNR              | 12.4–150 $\mu$ M | 3.72 $\mu$ M       | [3]       |
| Electrochemical | PAA–MWNT/GCE                | 4.0–400 $\mu$ M  | 1.0 $\mu$ M        | [4]       |
| Electrochemical | PEDOT/GCE                   | 5.0–45 $\mu$ M   | 3.8 $\mu$ M        | [5]       |
| Electrochemical | GC/MWCNT/Flu/GCE            | 15–84 $\mu$ M    | 5.0 $\mu$ M        | [6]       |
| Electrochemical | Poly Xa/FAD/MWCNT/GCE       | 5.0–170 $\mu$ M  | 1.0 $\mu$ M        | [7]       |
| Electrochemical | PGE/SWCNT/PCV/GCE           | 1.3–280 $\mu$ M  | 1.3 $\mu$ M        | [8]       |
| Electrochemical | AuNPs/PB/EGP                | 0.5–1000 $\mu$ M | 0.21 $\mu$ M       | [9]       |
| Ratiometric ECL | NGQDs                       | 10–400 $\mu$ M   | 2.5 $\mu$ M        | This work |

## References

- 1 S. Zhu, C. Lei, J. Sun, X.E. Zhao, X. Wang, X. Yan, W. Liu and H. Wang, *Sens. Actuators, B*, 2019, 282, 896.
- 2 Q. Gao, X. Cui, F. Yang, Y. Ma and X. Yang, *Biosens. Bioelectron.*, 2003, 19, 277.
- 3 M. Sahin and E. Ayrançi, *Electrochim. Acta*, 2015, 166, 261.
- 4 H. Dai, H. Xu, Y. Lin, X. Wu and G. Chen, *Electrochem. Commun.*, 2009, 11, 343.
- 5 R. Rajaram, S. Anandhakumar and J. Mathiyarasu, *J. Electroanal. Chem.*, 2015, 746, 75.
- 6 A. Sobczak, T. Rębiś and G. Milczarek, *Bioelectrochem.* 2015, 106, 308.
- 7 N.F. Atta, S.A. Abdel Gawad, E.H. El-Ads, A.R.M. El-Gohary and A. Galal, *Sens. Actuators, B*, 2017, 251, 65.
- 8 J. Zhu, X.Y. Wu, D. Shan, P. Yuan and X. Zhang, *Talanta*, 2014, 130, 96.
- 9 M. Wang and X. Kan, *Analyst*, 2018, 143, 5278.
